# Supplementary material for: Palliative enteral feeding for patients with malignant esophageal obstruction: a retrospective study
Source: Springer Nature journal article supplement (doi:10.1186/s12904-015-0056-5), 2015-11-05

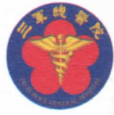

## 人體試驗計畫同意函

本審議會核准編號：2-104-05-030

計畫名稱：緩和性腸道營養對於惡性食道阻塞之研究

執行機構：三軍總醫院

計畫主持人：胃腸肝膽科張維國醫師

計畫書版本日期：V1.0\_20141219

本會審核通過之其他文件版本及日期：中文摘要：1040428 個案報告書：V4\_0\_1031128

業經本院2015年04月30日人體試驗審議會第二審議會審查通過，並同意免受試者同意書執行，該計畫案經評估屬低度風險，(持續審查頻率為每年一次)，有效期限至2016年04月29日，特此證明。

本審議會的運作，遵循藥品優良臨床試驗準則及政府相關法律規章。計畫主持人應於同意函有效期限屆滿前一個月，提出展延申請，本案須經本院人體試驗審議會通過後，方可繼續執行。

## Letter of Approval Institutional Review Board, Tri-Service General Hospital

TSGHIRB No.: 2-104-05-030

Protocol title: Palliative Enteral Feeding for Patients with Malignant Esophageal Obstruction.

Research institution: Tri-Service General Hospital

Principle investigator: Chang Wei-Kuo

Protocol version: V1.0\_20141219

Other documents: Chinese Abstract : 1040428 ; Case Report Form : V4\_0\_1031128

On 04/30/2015, the Institutional Review Board II of the Tri-Service General Hospital approved the above-named application.

The board is organized and operated in compliance with International Conference on Harmonization (ICH) / WHO Good Clinical Practice (GCP) and applicable laws and regulations.

This approval is valid for 1 year till 04/29/2016. The principle investigator is required to submit the application for extension 1 month before the expiration date.

Institutional Review Board

Chairman

余慕賢 Yu Mu Hsien

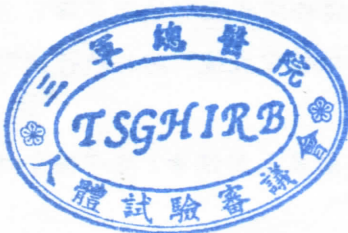

Supplement: MOESM1 [file 9754552]
